# Supplementary material
Source: ML conference proceedings conference paper supplement (https://openreview.net/forum?id=vGHEN7XAdB)
Supplement: supplementary_material [file attachment]

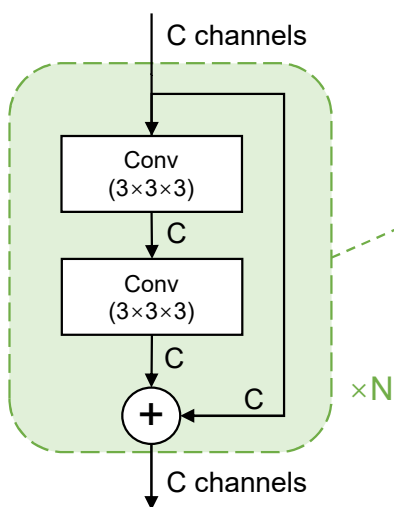

(b) Residual Block

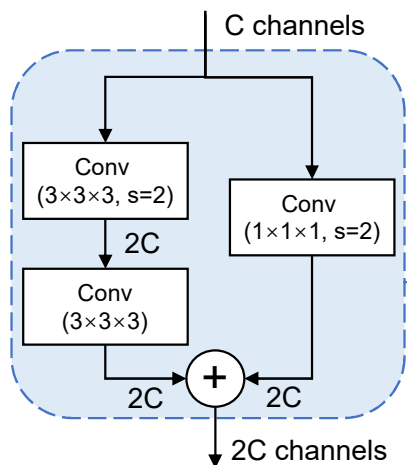

(c) Downsampling Block

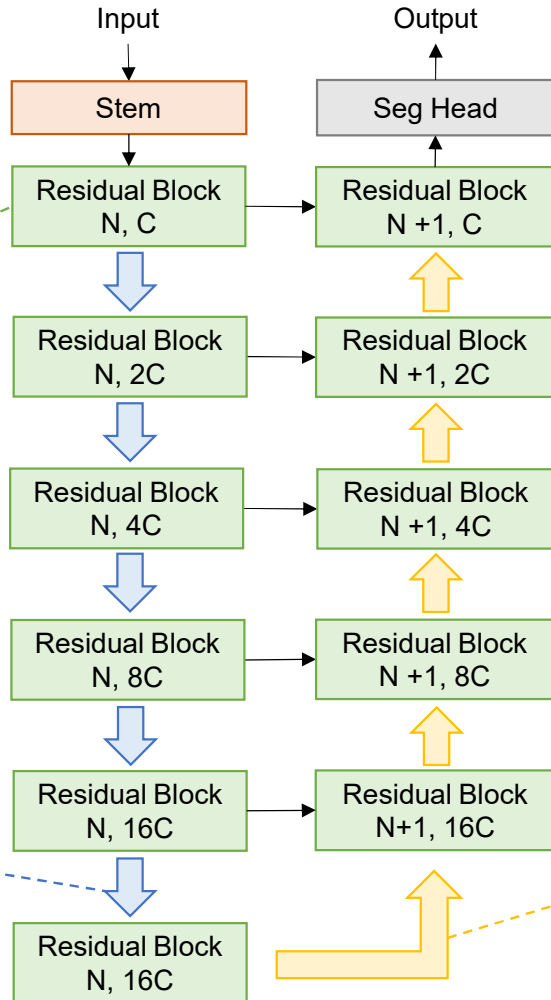

(a) STU-Net Architecture

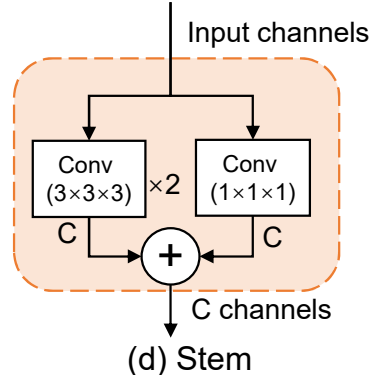

(d) Stem

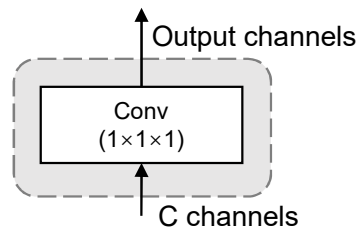

(e) Seg Head

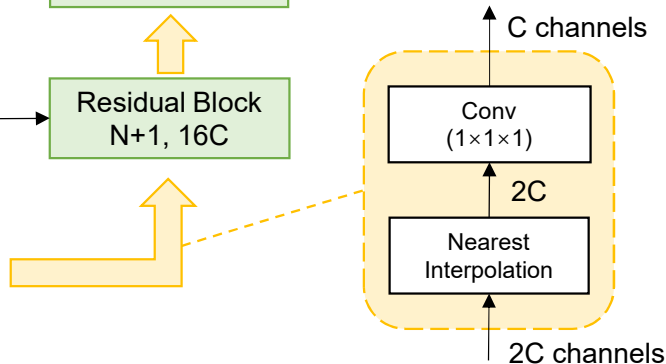

(f) Upsampling Block
